# Supplementary material for: CRISPR/Cas9-mediated deletion of the Wiskott-Aldrich syndrome locus causes actin cytoskeleton disorganization in murine erythroleukemia cells
Source: PeerJ journal article supplement (doi:10.7717/peerj.6284), 2019-01-16
Supplement: Fig.S2.pdf [file Fig.S2.pdf]

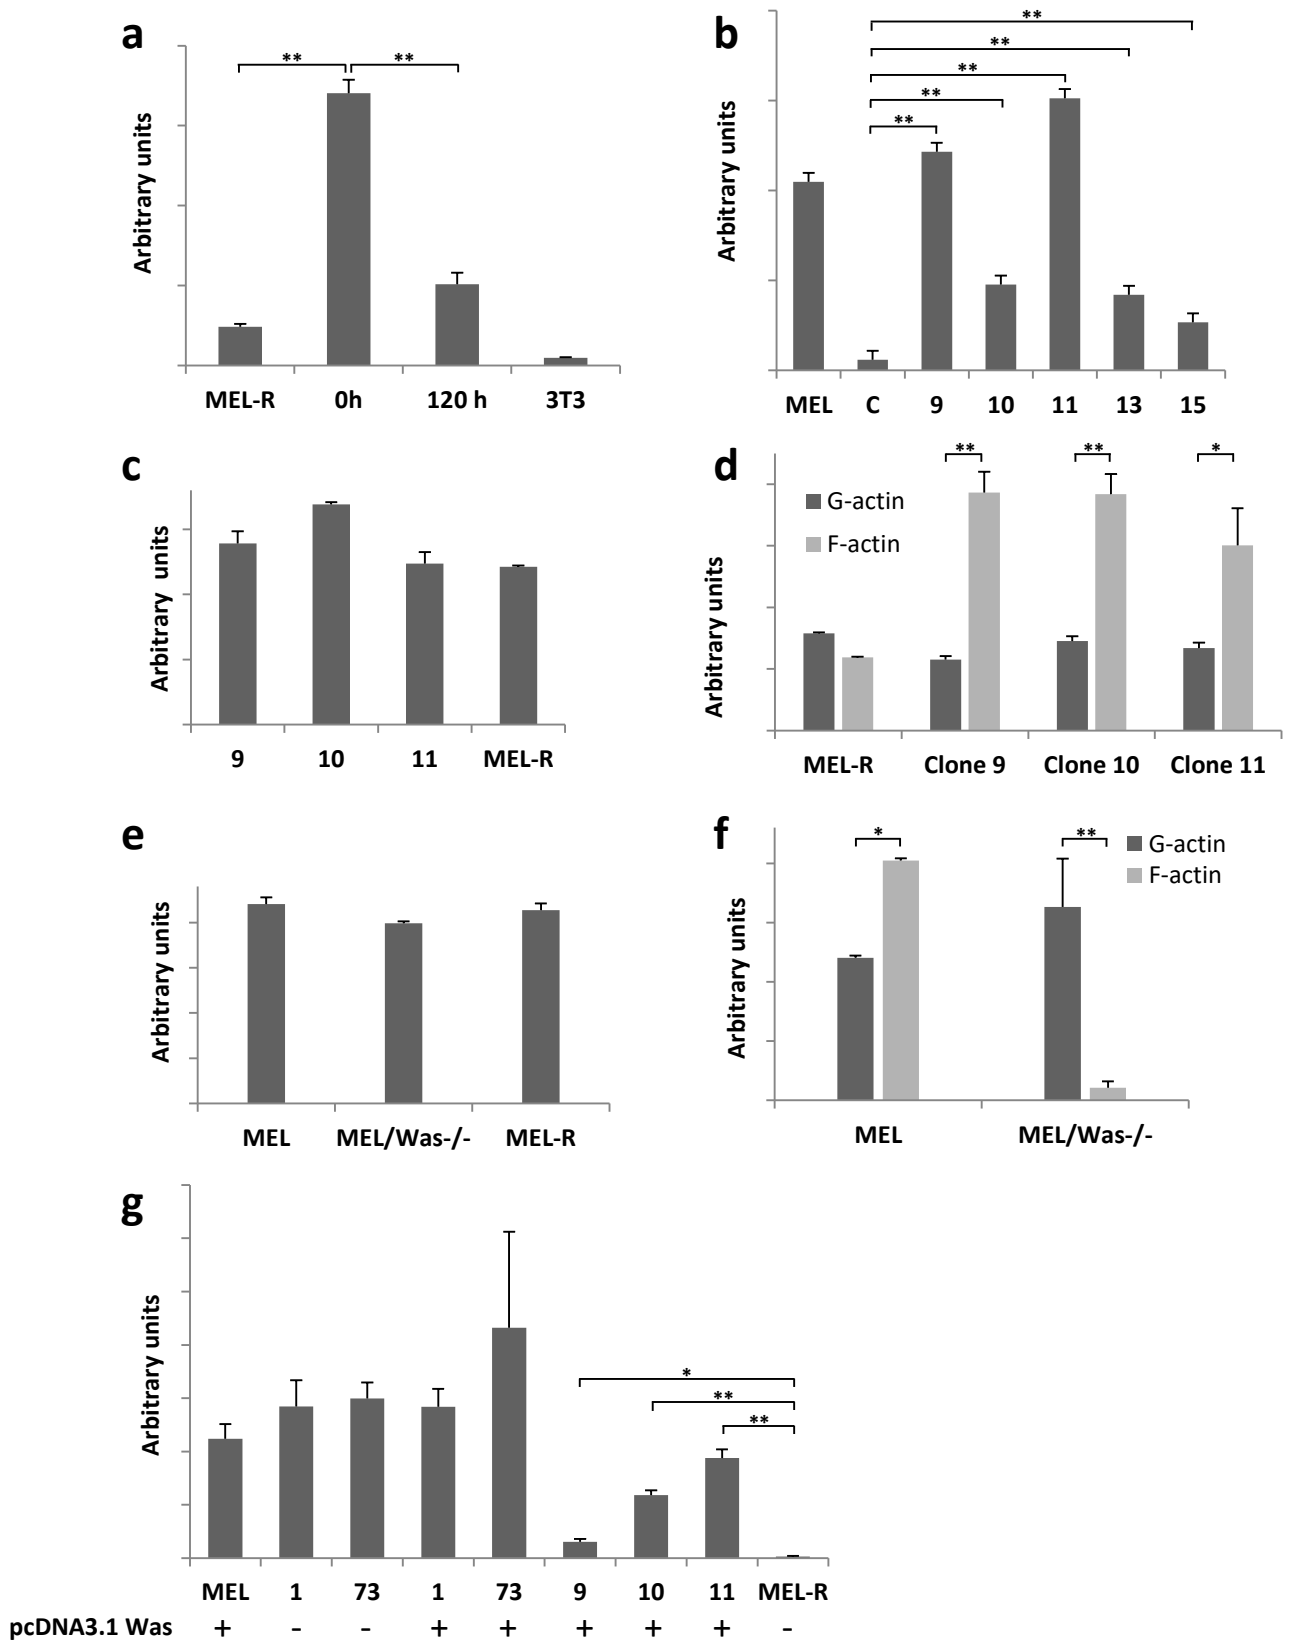

**Suppl. Fig. S2.** Western blot relative densitometric quantification using ImageJ corresponding to Figures 1A and B (a and b), 3A and B (c and d), 6A and B (e and f) and 7 (g). Data are shown as the mean of three measurements  $\pm$  standard deviation. \* P-value < 0.05, \*\* P-value < 0.01.
