# Supplementary material for: CRISPR/Cas9-mediated deletion of the Wiskott-Aldrich syndrome locus causes actin cytoskeleton disorganization in murine erythroleukemia cells
Source: PeerJ journal article supplement (doi:10.7717/peerj.6284), 2019-01-16
Supplement: Fig.S3.pdf [file Fig.S3.pdf]

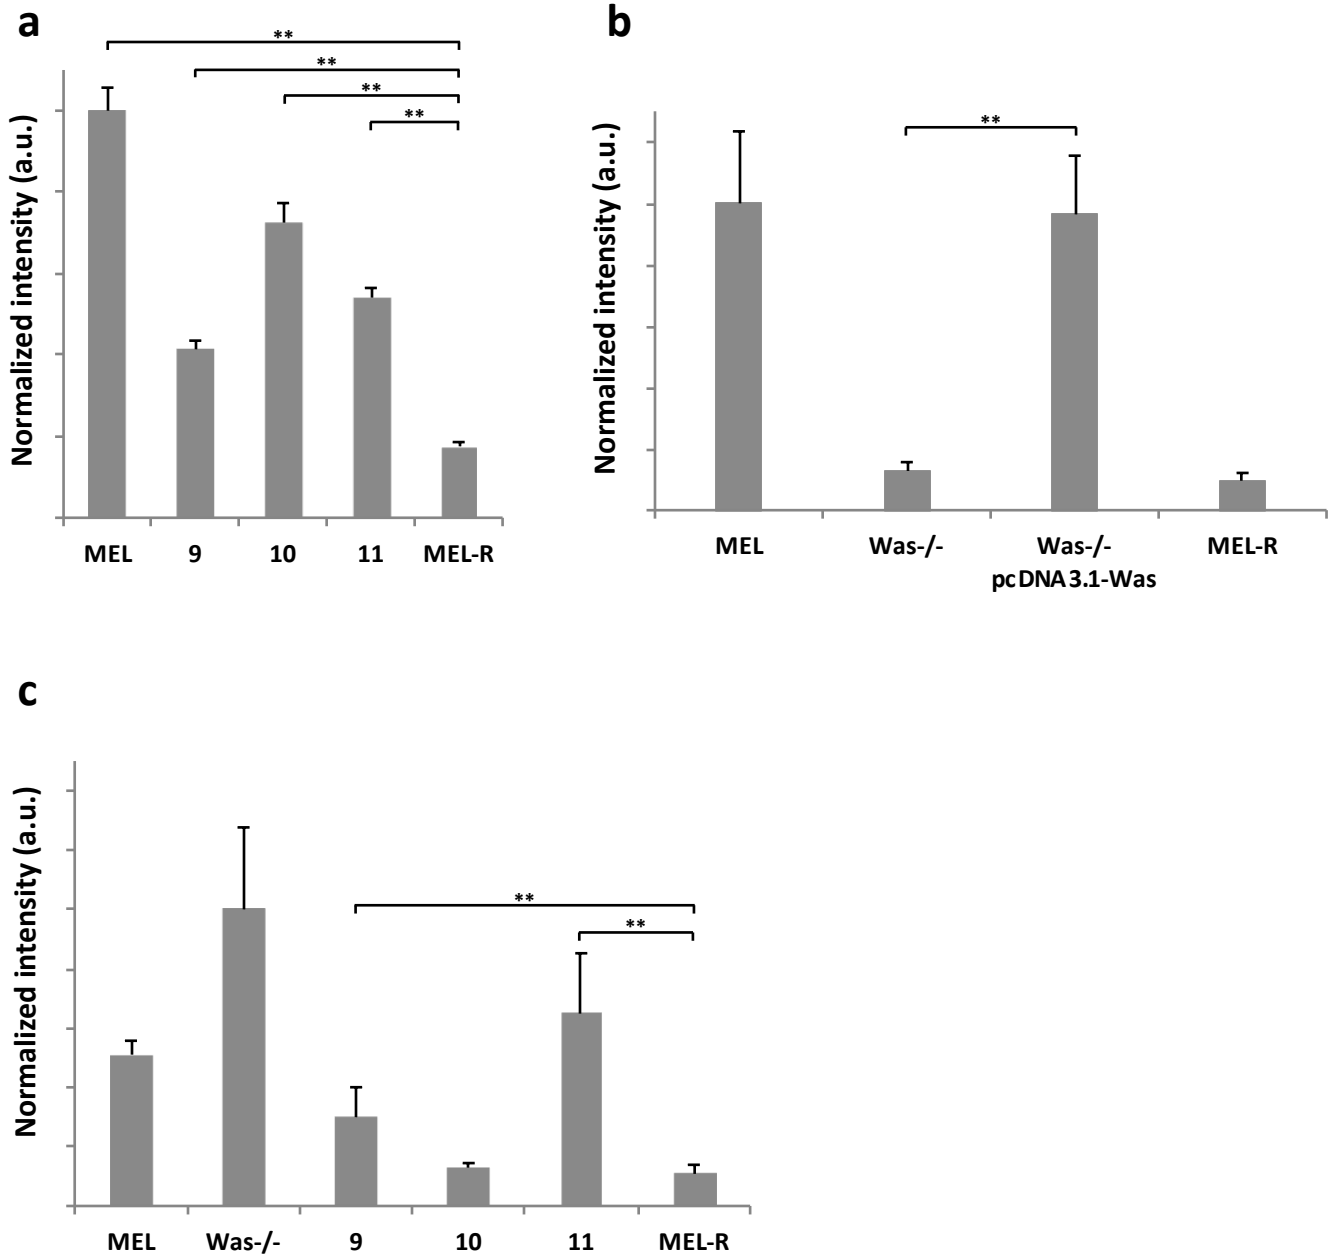

**Suppl.Fig.S3.** Quantitative analysis of fluorescent images corresponding to Figures 2 (a), 5 (b) and 8 (c). Normalized fluorescent intensity is expressed as arbitrary units (a.u.). Data are shown as the mean  $\pm$  standard deviation ( $n \geq 40$  cells per group). \* P-value  $< 0.05$ , \*\* P-value  $< 0.01$ .
