# Supplementary material for: CRISPR/Cas9-mediated deletion of the Wiskott-Aldrich syndrome locus causes actin cytoskeleton disorganization in murine erythroleukemia cells
Source: PeerJ journal article supplement (doi:10.7717/peerj.6284), 2019-01-16
Supplement: Fig.S4.pdf [file Fig.S4.pdf]

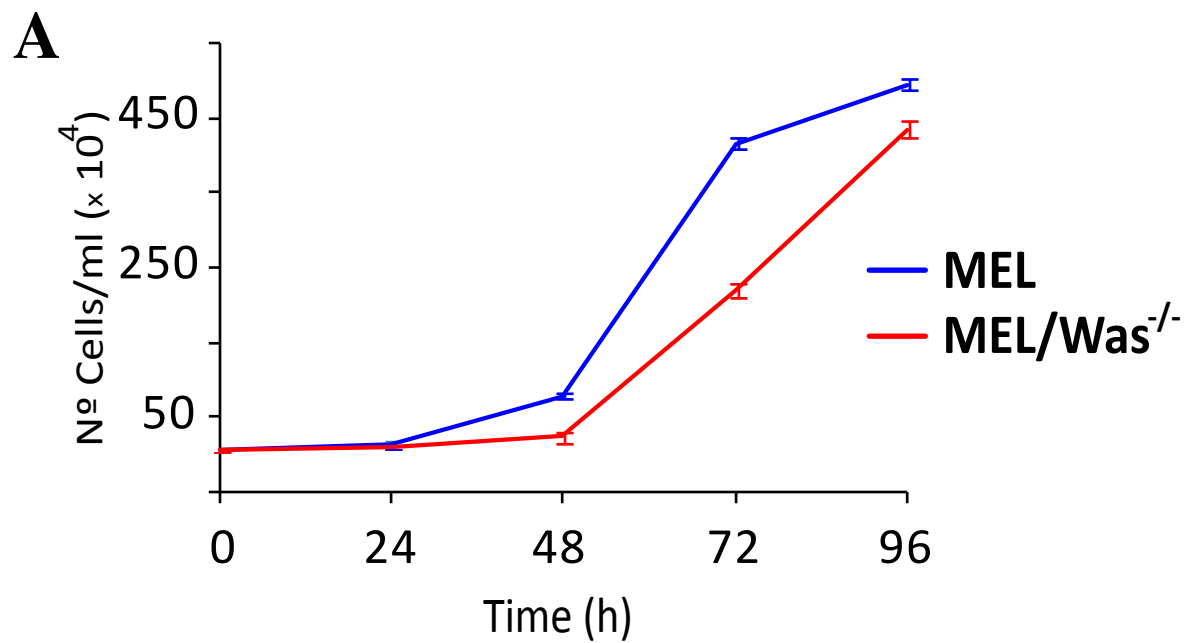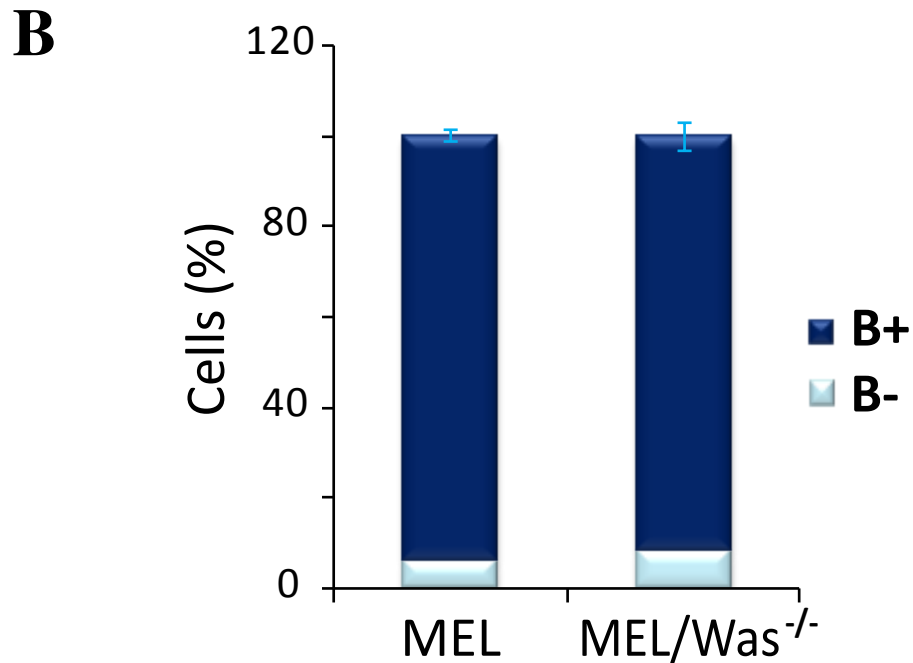

**Suppl.Fig.S4. Growth kinetics and HMBA-mediated differentiation in MEL/Was<sup>-/-</sup> cells.**

A) Growth kinetics of MEL and MEL/Was<sup>-/-</sup> cells measured every 24 hours over 4 days. B) Percentage of differentiation in MEL cells and MEL/Was<sup>-/-</sup> transfectants. Differentiated cells (B+) were determined by benzidine assay. Cells were cultured in the presence of 5 mM HMBA for 96 hours. Each bar in A) and B) indicates the standard deviation of three independent experiments.
